# Supplementary material for: Dataset of differential lipid raft and global proteomes of SILAC-labeled cystic fibrosis cells upon TNF -α stimulation
Source: PubMed Central journal article supplement (PMC5011161; doi:10.1016/j.dib.2016.08.012), 2016-08-20
Supplement: mmc1.pdf [file mmc1.pdf]

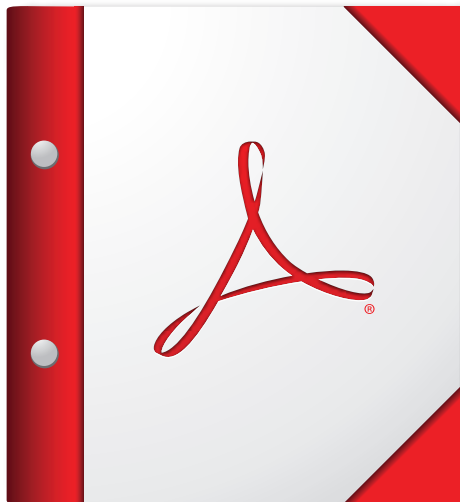

**Pour de meilleurs résultats, ouvrez ce porte-documents PDF dans Adobe Reader X, ou dans Adobe Acrobat X, ou version ultérieure.**

[Télécharger tout de suite Adobe Reader](#)
